# Supplementary material for: Structural insight into the substrate- and dioxygen-binding manner in the catalytic cycle of rieske nonheme iron oxygenase system, carbazole 1,9a-dioxygenase
Source: PubMed Central journal article supplement (PMC3423008; doi:10.1186/1472-6807-12-15), 2012-06-24

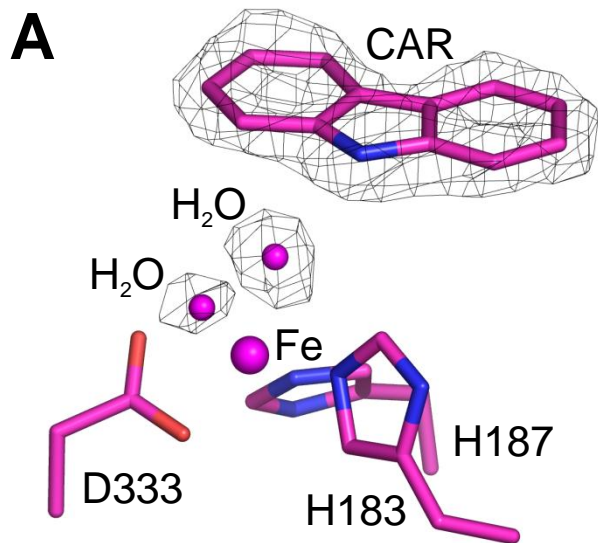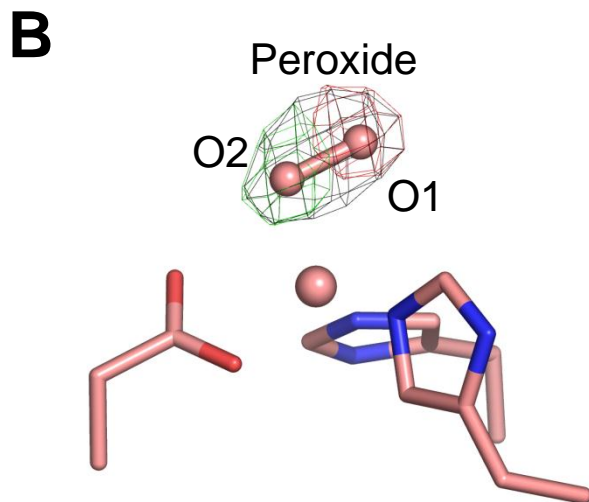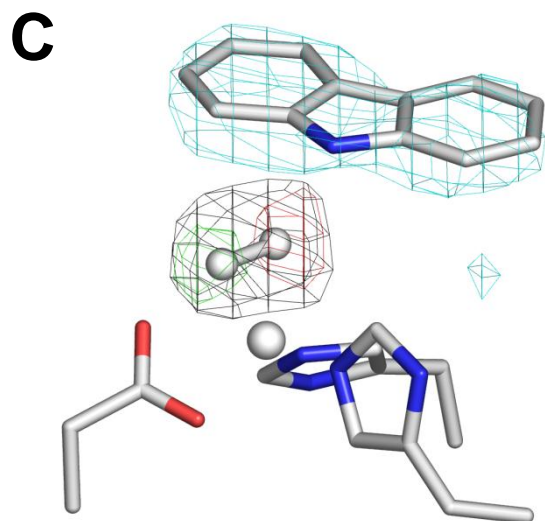

Supplement: 1472-6807-12-15-S1.pdf [file 1472-6807-12-15-S1.pdf]
